# Supplementary material for: New Particle Formation in the South Aegean Sea during the Etesians: importance for CCN production and cloud droplet number
Source: Copernicus journal article supplement (doi:10.5194/acp-2016-330), 2016-05-31
Supplement: Supplementary file 1 [file acp-2016-330-supplement.pdf]

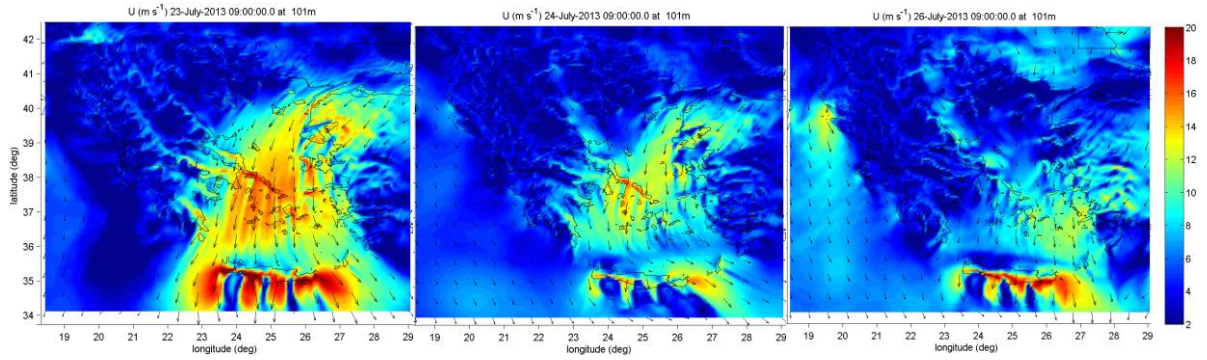

**Figure S1.** Wind simulated patterns on 23 (left), 24 (central) and 26 (right) July 2013 by WRF over the greater Greek domain.

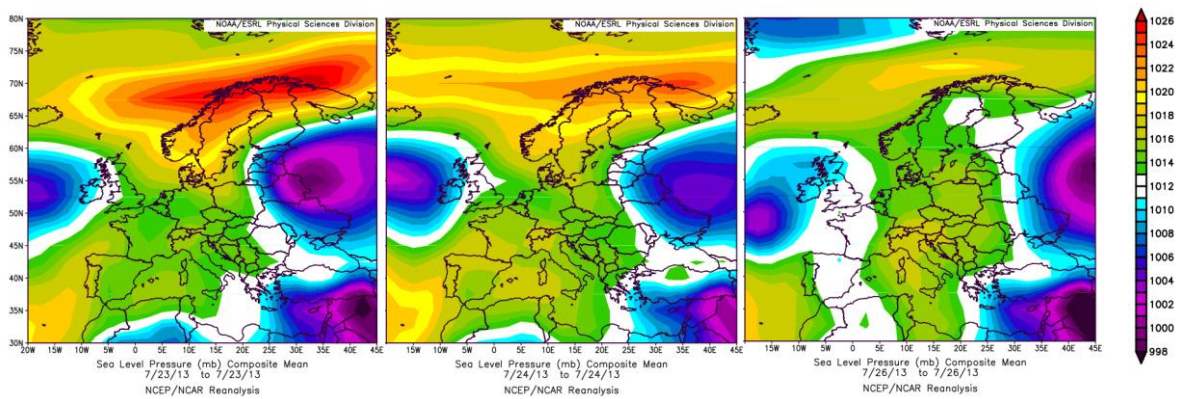

**Figure S2.** Mean daily sea pressure level over Europe on 23 (left), 24 (central) and 26 (right) July 2013, based on NCAR/NCEP reanalysis data.

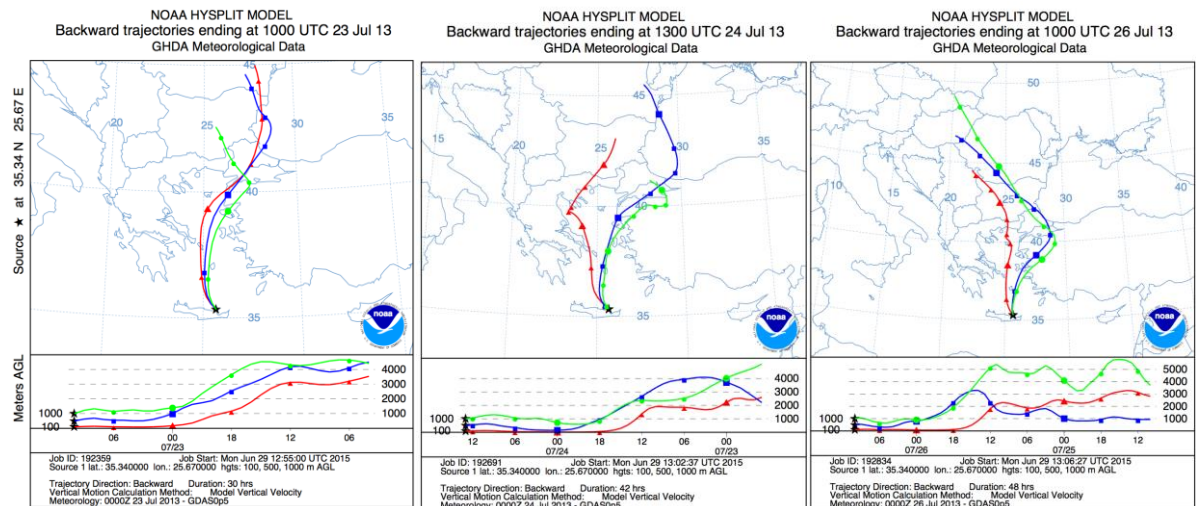

**Figure S3.** HYSPLIT4 back-trajectories computed with an end point (from 500m) at the Finokalia station, on 23, 24 and 26 July, 2013

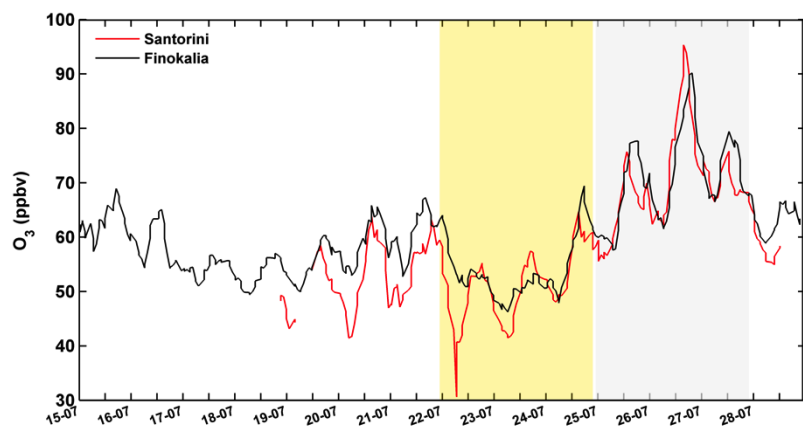

**Figure S4.** Measured  $O_3$  concentrations at Santorini and Finokalia stations.

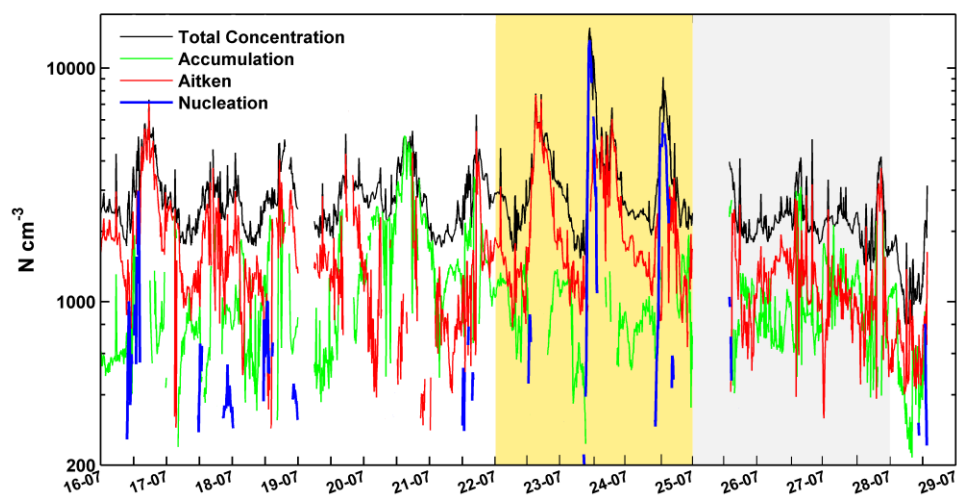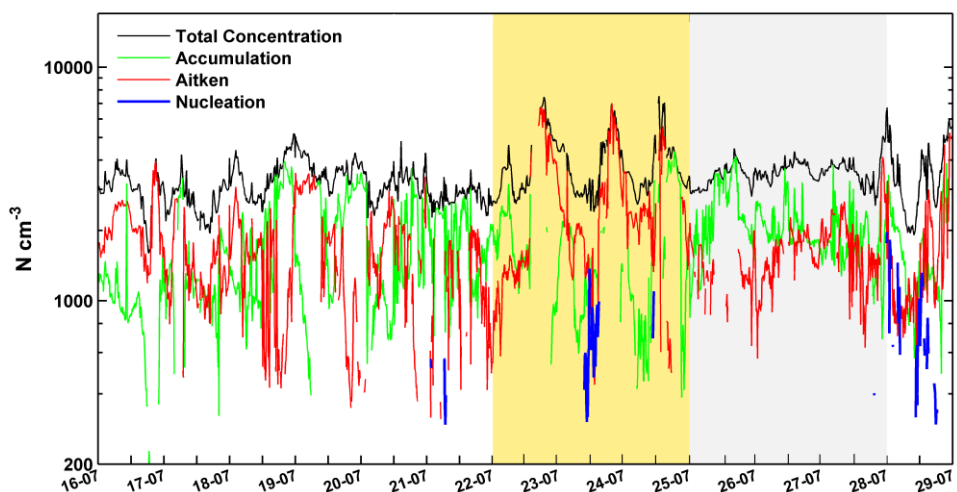

**Figure S5.** Size distributions of fine particles (10 min averaged); a) at Santorini, with dry mobility diameters from 10 to 500 nm and b) at Finokalia with dry mobility diameters from 9 to 848 nm; from 16 to 28 of July 2013.

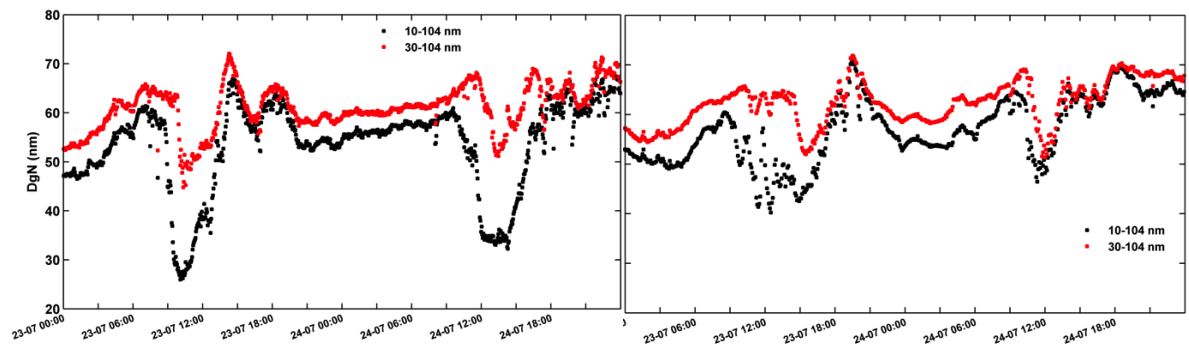

**Figure S6.** Time series of the number geometric mean diameter (DgN) of the nucleation and Aitken mode at a) Santorini and b) Finokalia, during 23 and 24 July 2013.



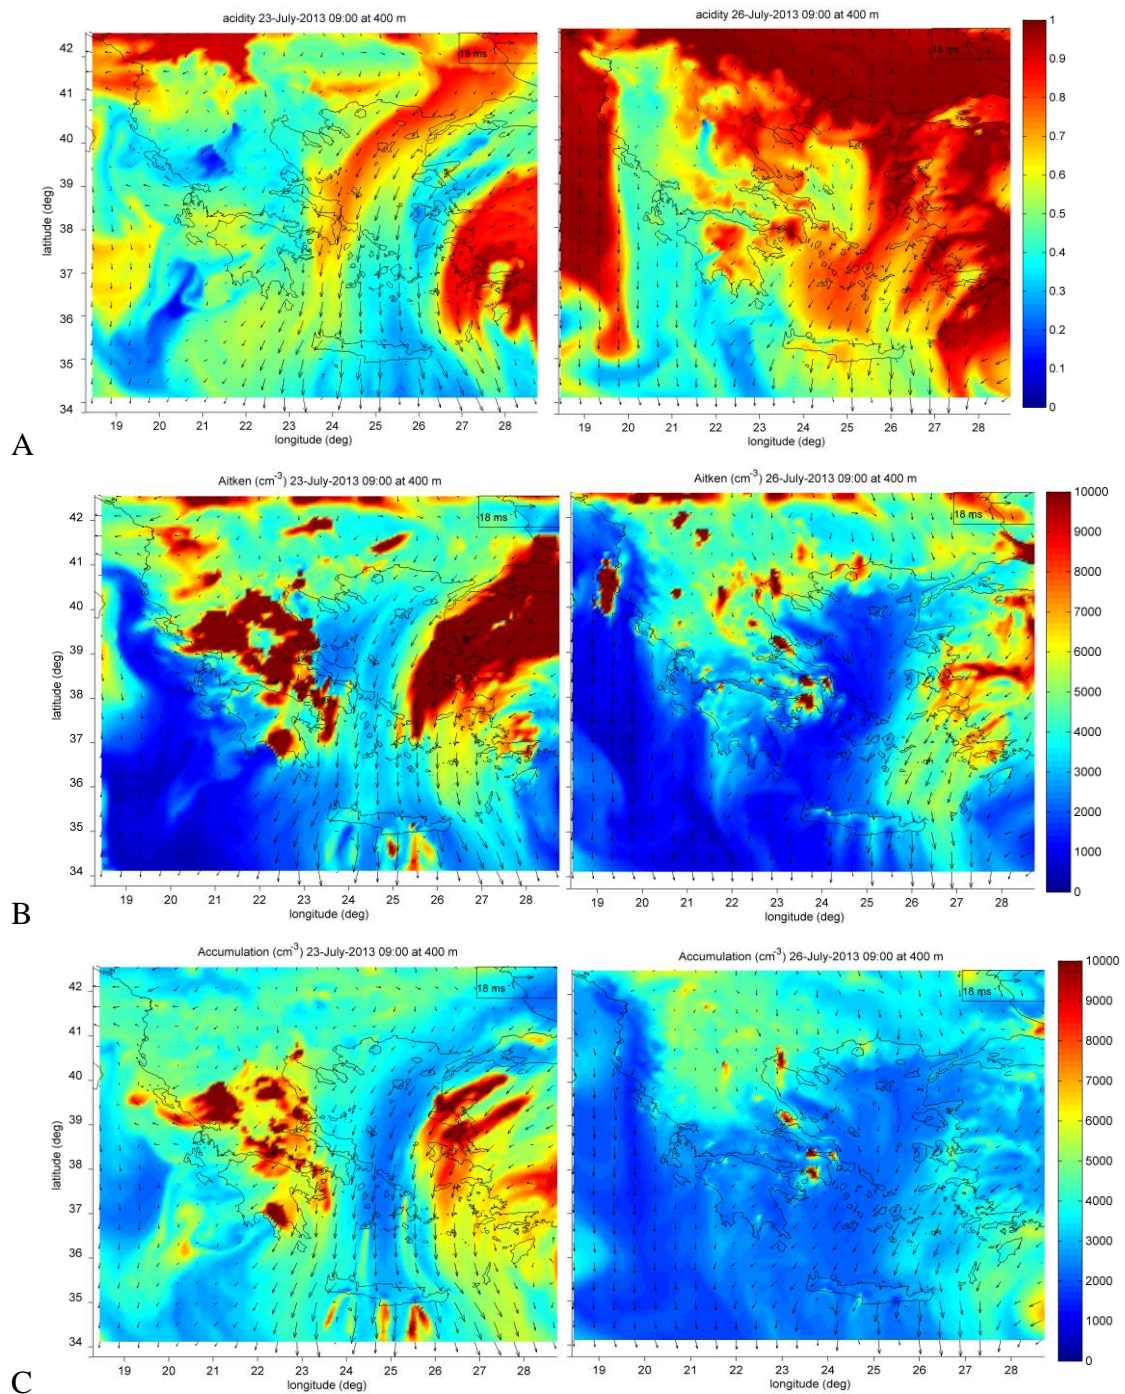

**C**  
**Figure S7.** A) acidity, B) Aitken mode and C) accumulation mode, at 400 m over the greater Greek domain as simulated by the WRF-chem, at 09:00 LST, on 23 (left) and 26 (right) panel July.
