# Supplementary material for: New Particle Formation in the South Aegean Sea during the Etesians: importance for CCN production and cloud droplet number
Source: Copernicus journal article supplement (doi:10.5194/acp-2016-330), 2016-05-31

NOAA HYSPLIT MODEL  
Backward trajectories ending at 0700 UTC 23 Jul 13  
GDAS Meteorological Data

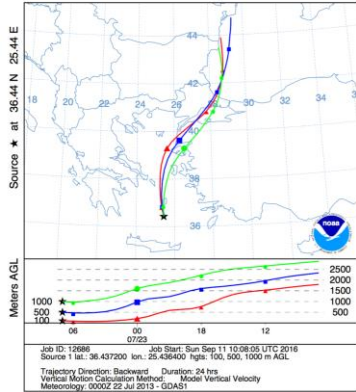

NOAA HYSPLIT MODEL  
Backward trajectories ending at 0900 UTC 24 Jul 13  
GDAS Meteorological Data

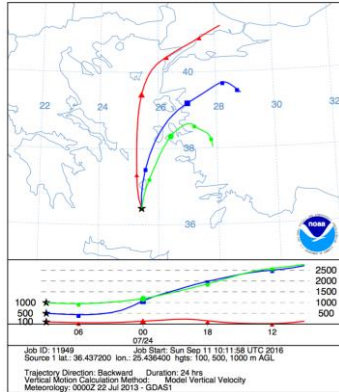

NOAA HYSPLIT MODEL  
Backward trajectories ending at 0700 UTC 26 Jul 13  
GDAS Meteorological Data

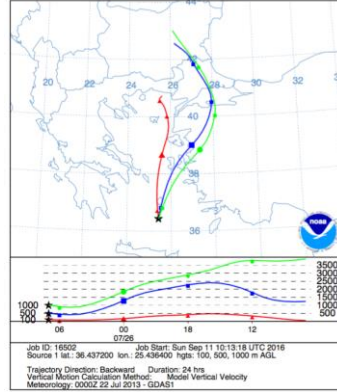

Supplement: Supplementary file [file acp-2016-330-AC2-supplement.pdf]
